# Supplementary material for: Harnessing Epigenetics through Grafting: Revolutionizing Horticultural Crop Production
Source: MDPI journal article supplement (doi:10.3390/horticulturae9060672), 2023-06-06
Supplement: s1 [file s1]

**Table S1. List of some miRNAs in regulation of plant grafting.**

| Rootstocks                                    | Scions                                        | miRNAs                                                                                        | Regulatory role in grafting                                                                                                                                                                       | Refs  |
|-----------------------------------------------|-----------------------------------------------|-----------------------------------------------------------------------------------------------|---------------------------------------------------------------------------------------------------------------------------------------------------------------------------------------------------|-------|
| Avocado cv. 'Velvick'                         | Avocado cv. 'Hass'                            | miR156,<br>miR172                                                                             | Regulating the maturity of avocado trees.                                                                                                                                                         | [1]   |
| <i>Solanum tuberosum</i> ssp. <i>andigena</i> | <i>Solanum tuberosum</i> ssp. <i>andigena</i> | miR156,<br>miR172                                                                             | Leaf/trichome development, aerial tubers, suppression of belowground tubers                                                                                                                       | [2,3] |
| <i>Nicotiana benthamiana</i>                  | <i>Nicotiana benthamiana</i>                  | miR172                                                                                        | Flowering                                                                                                                                                                                         | [4]   |
| Lycium Chinese Mill. (cv. Large leave goji)   | Tomato TA209'                                 | Goji novel 28,<br>Goji novel 9,<br>miR8007a-5p<br><br>miR162,<br>miR164,<br>miR166,<br>miR397 | Transport from rootstock <i>Lycium barbarum</i> to tomato confirms long-distance transport of miRNA in grafting.<br><br>Regulation of differential expression of fruit genes in grafted tomatoes. | [5]   |
| <i>Cucurbita moschata</i>                     | Cucumber '9930'                               | miR169,<br>miR319,<br>miR395                                                                  | Regulation of stress resistance in grafted cucumber seedlings.                                                                                                                                    | [6]   |
| Grapevine 'M4'                                | Vitis vinifera 'Cabernet Sauvignon'           | miR156                                                                                        | Involved in regulating stress defense mechanisms in heterozygous grafted grapes.                                                                                                                  | [7]   |
| <i>Lotus japonicus</i>                        | <i>Lotus japonicus</i>                        | miR2111                                                                                       | Translocates in a shoot-to-root direction to control rhizobial infection                                                                                                                          | [8]   |
| <i>Malus domestica</i> (Apple)                | <i>Malus domestica</i> (Apple)                | miR156,<br>miR172,<br>miR159,<br>miR171                                                       | Flower formation                                                                                                                                                                                  | [9]   |
| Pumpkin                                       | Pumpkin                                       | miR390b<br>precursor                                                                          | Transport of viral RNA                                                                                                                                                                            | [10]  |

Refs:

1. Ahsan, M.U.; Hayward, A.; Alam, M.; Bandaralage, J.H.; Topp, B.; Beveridge, C.A.; Mitter, N. Scion control of miRNA abundance and tree maturity in grafted avocado. *BMC Plant Biol.* **2019**, *19*, doi:10.1186/s12870-019-1994-5.
2. Bhogale, S.; Mahajan, A.S.; Natarajan, B.; Rajabhoj, M.; Thulasiram, H. V.; Banerjee, A.K. MicroRNA156: A potential graft-transmissible microrna that modulates plant architecture and tuberization in *Solanum tuberosum* ssp. *andigena*. *Plant Physiol.* **2014**, *164*, doi:10.1104/pp.113.230714.
3. Martin, A.; Adam, H.; Díaz-Mendoza, M.; Żurczak, M.; González-Schain, N.D.; Suárez-López, P. Graft-transmissible induction of potato tuberization by the microRNA miR172. *Development* **2009**, *136*, doi:10.1242/dev.031658.
4. Kasai, A.; Bai, S.; Li, T.; Harada, T. Graft-transmitted siRNA signal from the root induces visual manifestation of endogenous post-transcriptional gene silencing in the scion. *PLoS One* **2011**, *6*, doi:10.1371/journal.pone.0016895.
5. Khaldun, A.B.M.; Huang, W.; Lv, H.; Liao, S.; Zeng, S.; Wang, Y. Comparative profiling of miRNAs and target gene identification in distant-grafting between tomato and lycium (goji berry). *Front. Plant Sci.* **2016**, *7*, doi:10.3389/fpls.2016.01475.
6. Li, C.; Li, Y.; Bai, L.; Zhang, T.; He, C.; Yan, Y.; Yu, X. Grafting-responsive miRNAs in cucumber and pumpkin seedlings identified by high-throughput sequencing at whole genome level. *Physiol. Plant.* **2014**, *151*, doi:10.1111/ppl.12122.
7. Pagliarani, C.; Vitali, M.; Ferrero, M.; Vitulo, N.; Incarbone, M.; Lovisolo, C.; Valle, G.; Schubert, A. The accumulation of miRNAs differentially modulated by drought stress is affected by grafting in grapevine. *Plant Physiol.* **2017**, *173*, doi:10.1104/pp.16.01119.
8. Tsikou, D.; Yan, Z.; Holt, D.B.; Abel, N.B.; Reid, D.E.; Madsen, L.H.; Bhasin, H.; Sexauer, M.; Stougaard, J.; Markmann, K. Systemic control of legume susceptibility to rhizobial infection by a mobile microRNA. *Science (80-. ).* **2018**, *362*, doi:10.1126/science.aat6907.
9. An, N.; Fan, S.; Yang, Y.; Chen, X.; Dong, F.; Wang, Y.; Xing, L.; Zhao, C.; Han, M. Identification and characterization of miRNAs in self-rooted and grafted *Malus* reveals critical networks associated with flowering. *Int. J. Mol. Sci.* **2018**, *19*, doi:10.3390/ijms19082384.
10. Lezzhov, A.A.; Atabekova, A.K.; Tolstyko, E.A.; Lazareva, E.A.; Solovyev, A.G. RNA phloem transport mediated by pre-miRNA and viral tRNA-like structures. *Plant Sci.* **2019**, *284*, doi:10.1016/j.plantsci.2019.04.005.
